# Supplementary material for: Distinguishing between enduring and dynamic concussion symptoms: applying Generalisability Theory to the Rivermead Post Concussion Symptoms Questionnaire (RPQ)
Source: PeerJ. 2018 Sep 28;6:e5676. doi: 10.7717/peerj.5676 (PMC6166625; doi:10.7717/peerj.5676)
Supplement: Supplemental Information 3 — The first row numbered 1–16 indicate the corresponding RPQ items (1–16). Data entries start from the second row. [file peerj-06-5676-s003.xlsx]

## Sheet: Sheet1
2	2	0	4	2	4	3	1	2	4	4	3	4	4	2	1
3	2	1	2	2	2	2	0	2	2	1	2	1	2	0	3
4	2	0	4	4	3	2	0	3	4	4	3	4	4	0	3
3	4	3	2	1	4	1	1	3	3	4	4	4	3	3	3
3	2	1	2	4	4	3	2	4	2	1	3	4	3	2	4
4	4	4	1	1	3	1	1	1	1	1	4	1	4	0	3
1	0	0	2	2	2	3	2	2	2	2	2	1	2	0	0
4	1	0	1	3	1	3	0	1	1	1	1	0	1	0	1
2	3	0	3	3	0	0	1	1	3	2	4	1	0	0	1
3	2	0	2	2	4	3	2	1	2	0	1	1	1	2	0
4	2	2	4	1	4	4	0	4	3	3	3	3	4	3	2
2	3	0	2	2	3	2	3	2	2	2	2	1	1	0	2
2	2	0	1	2	4	3	0	2	2	2	1	2	2	0	2
1	1	0	1	1	2	3	2	3	2	1	3	0	0	0	2
3	2	3	2	4	4	4	3	3	4	3	4	1	0	0	4
1	3	2	3	4	4	4	2	4	2	3	3	2	1	0	3
1	4	1	1	1	4	1	1	2	1	2	2	2	2	0	1
0	0	0	0	0	3	0	0	2	2	0	2	3	0	0	1
2	2	1	2	3	2	1	1	3	2	2	2	2	2	1	2
0	0	2	3	0	2	2	2	2	2	0	1	2	2	0	2
0	1	0	0	2	1	3	1	3	1	2	3	0	0	0	1
2	2	0	1	0	0	0	0	0	3	2	3	3	0	0	0
2	0	0	2	1	2	0	2	2	0	2	3	0	2	0	2
2	2	0	0	2	3	1	0	0	2	1	3	0	0	0	1
0	0	2	0	0	3	1	2	2	2	0	2	0	0	0	0
1	1	1	1	3	3	2	0	2	1	2	1	1	1	0	1
2	2	0	2	0	1	0	0	0	1	1	1	0	1	0	1
2	2	2	3	3	1	2	1	1	2	1	1	1	1	0	2
2	2	0	1	1	1	2	0	1	1	1	1	0	2	0	0
4	2	3	3	1	3	3	2	3	3	3	4	2	2	0	2
3	3	2	3	1	3	2	1	3	3	2	3	2	2	0	2
2	3	1	2	2	2	1	1	2	2	3	3	1	2	1	2
2	2	0	0	3	3	2	1	0	0	0	0	1	0	0	1
1	1	0	0	2	2	2	1	0	1	1	2	0	0	0	1
1	0	0	0	2	2	1	2	2	0	0	0	1	1	0	0
2	3	1	1	2	3	0	0	2	2	3	3	2	0	0	2
2	0	0	1	0	4	0	2	3	1	1	1	0	0	0	0
1	0	2	0	1	2	1	1	1	1	1	2	0	1	0	1
3	2	0	0	3	2	4	0	3	1	2	2	0	2	0	2
2	2	0	2	3	2	3	2	2	2	2	2	0	0	0	2
1	1	1	0	1	0	1	0	0	0	1	0	0	0	0	0
2	2	0	3	1	3	3	2	3	4	3	3	0	4	0	3
3	2	1	0	0	3	1	0	1	4	4	4	0	0	0	2
4	3	0	2	1	2	2	1	3	3	2	3	1	2	0	2
2	2	0	2	1	1	0	0	0	2	1	2	0	0	0	0
2	0	0	0	0	1	0	0	0	0	0	0	0	0	0	1
2	2	0	0	0	0	1	1	1	3	2	2	1	0	0	0
2	0	0	0	2	1	1	0	1	1	1	1	0	0	0	1
0	0	0	0	1	1	1	1	1	1	1	1	0	0	0	1
0	0	0	1	1	1	0	2	0	1	2	2	0	1	0	1
2	1	0	2	0	0	0	0	0	0	0	0	2	2	0	0
2	1	0	0	2	0	0	0	0	0	0	0	0	0	0	0
1	2	2	0	0	2	0	1	2	1	0	0	2	0	0	0
0	3	0	0	3	0	0	0	2	1	0	1	0	0	0	3
1	2	0	0	0	0	0	0	0	0	0	0	0	0	0	0
0	1	0	0	0	1	0	0	0	1	0	0	0	0	0	0
0	0	0	0	0	0	0	0	0	0	0	1	0	0	0	1
3	3	0	0	0	1	1	0	0	1	0	1	3	0	0	1
0	0	0	0	1	2	2	0	0	4	3	2	0	0	0	0
0	0	0	0	1	2	0	0	0	0	1	0	1	0	0	0
2	2	1	1	3	3	2	0	1	3	3	3	0	1	0	0
2	0	0	0	0	1	1	0	2	1	1	1	0	0	0	0
1	0	0	0	0	0	0	0	0	0	0	0	0	0	0	0
2	2	0	2	1	0	1	0	1	1	1	0	2	0	0	0
1	0	0	1	1	1	1	0	1	2	0	1	0	0	0	0
1	0	0	0	1	2	0	0	0	1	1	1	0	0	0	0
0	0	0	0	0	2	0	0	0	0	0	0	1	0	0	0
2	0	0	0	0	0	0	0	0	0	0	0	0	0	0	0
2	2	0	3	4	3	2	2	2	2	3	2	2	1	0	4
0	0	0	0	0	0	0	0	0	0	0	0	0	0	0	0
0	0	0	0	0	0	0	0	0	0	0	0	0	0	0	0
2	4	3	3	3	4	2	3	3	3	3	3	2	3	0	3
4	3	1	3	4	4	3	2	4	3	4	4	4	3	4	4
4	3	4	3	4	4	4	4	4	3	3	3	3	2	2	3
3	3	1	2	0	3	2	1	2	4	3	3	3	4	2	1
3	3	1	4	3	4	3	2	2	2	2	2	2	4	3	3
3	2	1	3	4	4	2	3	2	2	2	2	3	3	2	4
4	3	2	3	3	3	2	2	2	3	2	3	2	2	2	3
3	3	2	3	3	4	3	0	3	4	4	3	2	3	0	1
0	0	0	3	2	3	4	2	2	3	2	3	3	3	2	4
4	3	3	0	2	2	4	0	3	2	4	3	3	0	1	0
3	2	0	2	2	2	2	2	2	4	3	3	3	3	0	0
4	3	0	2	1	2	2	0	2	3	3	2	3	4	0	2
3	2	0	2	2	3	1	1	2	2	3	3	2	1	3	2
3	3	1	2	2	2	1	1	1	2	2	2	3	1	2	2
2	2	0	3	2	3	1	2	3	1	2	2	0	2	0	4
0	2	0	2	2	2	2	2	2	2	2	2	2	2	2	2
1	2	0	1	2	3	2	0	3	4	4	4	0	0	0	1
1	3	0	0	3	2	0	3	3	1	2	2	2	1	1	2
2	2	2	3	1	2	1	1	1	2	1	2	1	3	0	1
3	2	0	1	1	2	2	2	2	2	2	3	0	0	0	1
1	1	0	2	1	3	3	0	3	2	2	2	0	0	0	2
0	2	0	0	2	3	0	0	2	2	2	2	2	2	0	2
2	2	0	0	1	2	0	0	0	1	2	2	3	3	0	2
3	0	1	2	2	2	2	0	2	0	0	2	1	0	1	2
1	0	0	0	1	3	0	0	1	2	2	2	2	2	2	1
0	2	0	1	1	2	2	1	2	2	1	2	0	0	0	2
1	1	0	0	0	0	2	0	1	3	3	3	2	1	0	1
1	0	0	0	1	1	0	2	3	3	2	2	0	1	0	1
0	0	0	0	3	2	2	0	1	2	2	2	0	0	0	2
1	1	1	1	1	1	1	1	1	1	1	1	1	1	1	1
2	0	0	1	0	2	0	0	1	0	2	2	1	2	2	0
0	0	0	2	3	1	1	0	1	2	0	0	2	1	0	2
3	1	0	0	2	0	0	0	0	3	1	2	1	0	0	1
1	2	0	0	0	2	1	1	1	1	1	1	0	1	0	1
4	3	1	1	1	0	1	0	0	1	0	0	1	0	0	0
0	0	0	0	1	1	1	1	1	1	1	1	1	1	1	1
0	1	1	0	0	1	1	1	1	1	1	2	0	0	1	1
0	2	0	0	1	2	0	0	1	1	1	1	1	1	1	0
1	1	0	0	1	1	1	0	1	1	1	2	0	0	0	1
0	0	0	0	2	0	2	0	0	3	2	2	0	0	0	0
1	0	0	1	1	1	1	1	1	1	1	1	0	0	0	0
0	3	0	0	2	1	1	0	1	0	0	0	0	0	0	2
0	0	0	1	1	0	1	0	1	1	0	1	1	1	0	1
2	0	0	1	0	0	0	0	0	2	0	3	0	0	0	0
3	1	0	0	0	0	0	0	0	0	1	1	1	0	0	0
0	0	0	0	0	0	0	0	2	2	1	0	1	0	0	1
1	1	0	0	0	0	0	0	1	1	1	0	1	0	0	0
1	0	0	0	1	2	1	0	0	0	0	0	0	0	0	1
3	0	0	0	0	2	0	0	0	0	0	0	1	0	0	0
0	0	0	0	0	1	0	0	1	1	0	0	1	0	0	0
2	0	0	0	2	0	0	0	0	0	0	0	0	0	0	0
1	0	0	0	0	0	0	0	0	1	0	1	0	0	0	0
0	0	0	0	1	0	0	0	1	0	0	0	0	0	0	0
0	0	0	0	0	2	0	0	0	0	0	0	0	0	0	0
1	0	0	0	0	0	0	0	0	0	0	0	0	0	0	0
0	0	0	0	0	0	0	0	0	0	0	0	0	0	0	0
0	0	0	0	0	0	0	0	0	0	0	0	0	0	0	0
2	3	3	1	3	1	1	2	3	2	4	3	2	2	2	3
2	4	3	3	4	4	2	4	4	4	4	1	3	1	4	3
3	2	2	2	2	4	4	4	3	3	2	4	3	0	3	0
3	3	3	3	2	3	3	4	2	3	3	2	4	4	4	3
3	2	0	4	1	3	1	1	1	1	1	3	1	3	1	1
0	2	0	0	2	4	1	1	2	3	3	3	2	1	0	3
2	1	2	2	2	2	1	0	1	2	2	2	1	1	1	1
0	0	0	0	3	3	2	1	2	2	2	2	0	1	0	0
1	0	0	2	1	2	0	1	0	2	2	2	1	2	0	0
3	0	0	1	0	2	0	0	0	1	0	1	3	1	0	1
0	0	0	0	2	1	1	0	1	1	1	1	0	0	0	2
0	0	0	2	0	0	2	0	0	1	1	2	0	1	0	1
3	0	0	0	0	0	0	0	0	2	1	0	0	1	0	0
0	0	0	0	0	0	1	0	0	1	1	0	0	0	0	0
0	0	0	0	0	0	0	0	0	0	0	0	0	0	0	0
0	0	0	0	0	0	0	0	0	0	0	0	0	0	0	0
0	0	0	0	0	0	0	0	0	0	0	0	0	0	0	0
3	0	0	2	3	3	3	3	3	4	4	4	2	2	2	4
4	2	2	3	3	3	4	1	2	4	3	3	3	2	2	2
3	3	1	1	4	4	4	3	4	4	4	4	4	4	0	3
3	2	2	3	3	4	2	1	3	3	4	4	2	0	2	4
4	2	0	3	1	2	0	0	1	2	3	1	0	4	0	2
4	3	2	4	0	4	4	4	4	4	4	4	1	4	0	4
2	0	0	1	4	3	3	2	2	1	1	1	0	0	0	1
3	2	0	4	3	3	3	2	4	3	2	2	2	4	2	2
2	0	0	3	0	1	2	3	1	2	1	2	0	0	0	1
2	0	0	0	0	2	0	0	0	0	0	0	0	0	0	0
1	1	0	1	1	2	2	0	1	2	2	2	1	2	0	0
2	2	1	0	0	3	0	1	0	1	1	1	0	0	0	1
0	2	0	3	1	2	2	1	2	2	2	2	1	3	0	2
1	3	1	3	2	2	3	3	2	3	3	3	0	1	0	2
2	1	2	1	1	2	2	2	1	1	2	1	0	0	0	1
1	1	0	1	2	2	2	1	1	1	1	1	1	0	0	1
1	0	0	0	0	2	1	0	0	1	0	1	0	0	0	0
1	1	1	1	1	1	1	2	1	3	1	1	1	1	0	2
0	0	0	0	0	1	0	0	1	0	0	0	1	2	0	2
0	1	0	0	0	0	1	1	1	1	0	0	0	0	0	1
1	2	2	0	3	3	3	2	2	0	2	1	0	0	0	0
1	0	0	0	0	0	0	0	0	0	0	0	0	0	0	0
4	0	2	2	1	1	1	2	2	1	1	1	0	2	0	1
0	3	0	0	4	2	2	0	0	2	2	2	0	0	0	0
1	1	1	1	1	1	2	1	1	2	2	2	1	1	0	1
1	1	0	0	2	3	1	1	1	2	3	2	1	3	2	1
0	0	0	2	1	2	2	0	0	0	0	0	2	0	0	1
2	1	1	0	1	2	0	1	1	2	0	0	0	2	0	2
0	2	0	0	2	1	1	0	0	1	1	1	1	1	1	1
1	0	0	1	0	0	0	0	0	0	0	1	0	1	0	0
2	3	2	2	3	3	1	2	2	2	2	2	2	2	1	2
1	1	0	0	2	2	1	0	0	0	0	0	1	0	1	1
0	0	0	0	0	0	0	0	0	1	0	0	0	0	0	0
1	1	1	0	1	1	1	1	1	1	1	1	0	1	0	1
1	0	0	1	1	1	1	1	1	1	1	1	1	1	0	0
2	1	0	1	2	2	0	1	1	3	3	2	1	0	0	1
0	0	0	0	0	0	0	0	2	1	0	0	0	0	0	0
1	0	0	0	0	0	0	0	0	1	0	0	0	0	0	0
1	0	0	1	2	2	1	0	1	1	1	1	0	1	0	0
0	0	0	0	0	0	0	0	0	0	0	0	0	0	0	0
1	1	0	0	1	1	1	1	1	1	1	1	1	1	1	1
1	0	0	0	0	0	1	1	1	2	1	1	0	0	0	0
1	0	0	0	0	0	0	0	0	0	0	0	0	0	0	0
3	2	0	2	3	2	2	2	2	3	1	2	0	0	0	1
0	0	0	0	1	1	0	0	0	1	1	0	0	0	0	0
0	0	0	0	1	0	0	0	0	0	0	0	0	0	0	1
1	1	0	0	1	1	1	0	2	3	2	2	1	0	0	1
0	0	0	0	0	1	0	0	0	0	0	0	0	0	0	0
0	0	0	0	1	1	1	1	1	1	1	0	0	0	0	1
0	1	0	0	2	2	1	1	1	2	2	1	0	1	0	2
2	1	1	1	1	1	1	1	1	1	1	1	1	2	1	1
0	0	0	0	0	0	0	0	0	1	0	0	0	0	0	0
1	0	0	0	0	0	0	1	0	1	0	0	0	0	0	0
1	3	0	0	2	0	1	0	1	1	1	1	1	0	0	0
1	0	0	0	0	0	0	0	0	1	1	1	1	0	0	0
0	0	0	0	0	1	0	0	0	0	0	0	0	0	0	0
0	0	0	0	1	0	0	1	1	0	0	0	0	0	0	0
1	3	0	0	1	2	1	1	2	1	1	2	0	0	0	1
0	0	0	0	1	4	4	0	4	4	4	4	0	0	0	4
0	0	0	0	0	0	0	0	0	0	0	0	0	0	0	0
1	0	0	0	1	1	1	0	0	0	0	0	0	0	0	0
1	1	0	0	0	1	1	0	1	2	1	1	0	0	0	1
2	2	0	0	0	1	0	0	0	0	0	0	0	0	0	0
0	1	0	0	0	0	0	0	0	0	0	0	0	0	0	0
0	0	0	0	0	0	0	0	0	0	1	1	0	1	0	1
0	0	0	0	0	0	0	0	0	0	0	0	0	0	0	0
0	0	0	0	0	0	0	0	0	1	0	1	0	0	0	0
1	1	0	1	1	0	0	0	0	0	0	0	0	0	0	0
0	0	0	2	1	0	3	0	1	1	1	0	0	1	0	0
0	0	0	0	0	0	0	0	0	0	0	0	0	0	0	0
0	0	0	0	0	0	0	0	0	0	0	0	0	0	0	0
2	2	2	2	2	2	3	2	2	2	2	2	2	2	0	2
2	2	0	2	1	2	0	0	0	2	1	2	3	2	3	2
2	3	3	2	2	3	0	2	3	3	3	3	0	0	0	2
0	0	0	0	0	0	0	0	0	0	0	0	0	1	0	0
3	3	1	4	2	2	3	2	3	3	3	4	3	4	3	3
3	3	1	4	4	4	2	3	3	3	3	3	3	3	3	3
2	2	0	0	2	2	2	2	2	3	3	2	2	2	1	2
2	2	2	3	3	3	2	0	2	2	3	2	2	3	2	3
2	1	0	2	3	1	1	1	1	2	2	2	1	2	1	2
4	2	0	0	0	0	0	0	0	0	0	0	1	0	0	0
2	0	0	3	2	2	1	1	2	2	2	3	0	0	0	0
0	0	0	0	0	2	1	0	0	1	0	1	0	0	0	0
0	0	0	0	0	0	0	0	1	1	1	1	1	1	0	0
2	2	1	2	2	2	1	1	1	2	2	2	1	1	1	2
0	0	1	3	3	1	1	0	1	1	0	1	0	3	0	1
3	2	0	3	4	4	4	3	4	4	4	2	0	0	0	4
2	0	0	0	1	1	0	0	0	2	2	2	0	0	0	1
0	1	0	0	1	2	1	0	0	1	1	1	0	0	0	2
0	0	0	0	0	1	1	1	1	2	0	1	0	0	0	0
1	0	0	1	1	2	1	1	1	2	2	2	1	1	0	1
0	0	0	0	0	3	0	0	0	3	3	3	0	3	0	0
0	0	0	0	3	2	1	0	2	2	2	2	0	0	0	2
4	2	1	3	1	2	2	2	2	2	2	2	3	2	0	1
1	1	1	2	2	1	1	0	0	1	1	1	1	1	1	2
1	1	0	0	2	3	0	3	0	4	4	4	2	0	2	2
1	0	1	0	1	1	0	0	0	0	0	0	0	0	0	1
1	1	3	2	0	1	0	0	1	4	2	3	1	1	1	1
0	0	0	0	1	0	0	0	0	1	0	1	0	0	0	0
0	0	0	1	2	3	1	2	2	1	1	2	0	0	0	0
1	0	0	0	1	0	0	0	1	0	0	0	0	0	0	0
2	2	0	0	0	1	0	0	1	2	2	2	2	3	4	0
2	0	2	3	3	3	3	1	2	1	0	2	1	1	0	1
0	0	0	0	0	0	0	0	0	1	0	0	0	0	0	0
0	0	0	0	0	1	1	1	1	1	1	1	0	0	0	0
1	2	0	0	1	0	0	0	0	1	0	0	2	0	0	0
0	0	0	0	1	0	0	0	1	0	0	0	0	0	0	1
1	0	0	0	0	0	1	1	1	1	1	1	1	1	0	0
4	0	0	0	0	0	0	0	1	1	0	0	0	0	0	0
2	0	0	0	2	1	1	0	2	1	0	0	0	0	0	1
1	2	0	2	0	0	2	0	1	3	1	1	0	0	0	0
1	0	0	1	1	1	2	1	1	1	1	1	0	0	0	0
0	2	0	0	0	2	1	0	0	0	0	1	0	0	0	0
0	0	0	1	0	1	1	1	1	1	1	0	0	0	0	1
1	0	0	0	1	0	0	0	0	0	1	1	0	1	0	0
0	0	0	0	2	0	0	0	0	2	2	0	0	0	0	0
0	2	0	0	4	2	0	0	2	0	0	2	0	0	0	2
1	1	0	1	1	1	1	0	1	1	1	1	1	1	1	1
1	0	0	0	0	1	1	0	1	0	1	0	0	0	0	1
1	1	0	0	1	2	1	1	1	1	1	1	1	1	0	0
0	2	0	0	1	2	1	0	1	1	0	0	1	0	0	0
1	0	0	0	1	1	1	1	1	1	1	1	0	0	0	1
0	0	0	0	0	0	0	0	0	0	0	0	0	0	0	0
1	0	0	0	2	1	0	0	0	2	1	1	0	0	0	0
0	0	2	0	3	3	0	3	2	0	0	0	0	0	0	2
1	1	1	1	1	1	1	1	1	1	1	1	1	1	1	1
1	1	1	1	1	1	1	1	1	1	1	1	1	1	1	1
0	0	0	0	0	0	0	0	0	2	2	3	0	0	0	2
4	3	2	3	4	4	4	4	4	4	4	4	2	3	2	4
1	1	1	2	1	2	2	1	1	3	3	3	2	0	0	1
2	3	0	1	1	3	2	1	3	3	2	2	3	3	0	2
0	3	0	2	0	4	0	1	2	2	4	3	0	1	0	3
1	2	0	2	0	2	2	1	2	2	2	2	0	2	0	0
0	0	0	0	0	0	0	0	0	0	0	0	0	0	0	0
1	0	0	0	1	2	1	0	1	1	1	1	1	2	0	1
0	0	0	0	1	1	1	0	1	2	0	1	0	1	0	1
1	2	0	2	2	2	3	3	3	3	3	3	2	2	1	2
1	0	0	0	0	1	0	0	1	1	0	0	1	0	0	1
0	0	0	0	0	0	0	0	0	0	0	0	0	0	0	0
0	0	0	0	0	0	2	0	2	2	0	2	0	0	0	1
3	3	0	3	1	2	2	1	1	3	2	2	1	1	0	0
1	1	0	0	0	1	0	0	1	1	0	0	0	0	0	0
0	0	0	0	0	0	0	0	0	0	0	0	0	0	0	0
0	0	0	0	0	0	1	0	1	1	1	1	0	0	0	0
2	0	0	0	0	0	0	0	0	0	0	0	0	0	0	0
2	0	0	3	2	2	2	1	1	1	2	2	0	1	0	1
4	1	1	3	2	3	2	1	2	3	1	1	1	1	1	2
2	1	0	2	4	4	2	0	1	2	1	2	4	4	0	1
3	3	0	1	4	4	1	2	3	2	3	3	2	0	2	3
2	2	2	2	0	3	1	1	3	3	3	0	1	1	0	1
1	0	0	0	1	3	3	3	4	4	4	4	0	3	0	4
1	0	0	0	1	1	1	1	1	1	0	1	0	0	0	0
3	0	0	3	4	2	1	1	1	1	1	2	0	2	0	1
0	0	0	1	1	1	2	0	2	2	1	2	0	2	0	2
2	1	0	0	0	1	0	0	0	0	0	0	0	1	0	0
2	0	0	2	0	0	1	0	1	2	1	2	2	2	0	0
0	2	1	1	1	2	0	2	1	2	2	1	2	0	1	2
2	2	2	1	2	3	3	2	1	1	1	2	3	2	2	3
0	0	0	0	0	0	0	1	0	0	1	2	0	0	0	2
1	1	1	1	1	1	1	1	1	1	1	1	0	0	0	1
0	0	0	0	1	0	1	0	0	0	0	0	0	0	0	0
1	1	0	1	0	1	1	0	1	2	1	1	0	0	0	1
0	1	0	1	1	2	2	1	1	2	1	1	1	1	0	1
0	0	0	0	0	0	0	0	1	0	0	0	0	0	0	0
0	2	0	2	0	0	1	2	2	3	1	2	0	2	2	2
0	0	0	0	0	1	1	2	0	0	1	0	0	0	0	0
0	1	0	0	0	0	0	0	0	2	0	2	2	0	0	0
4	0	2	2	0	2	2	0	2	1	1	0	0	1	0	1
1	1	0	3	2	1	1	1	2	2	2	3	0	1	0	1
1	1	1	0	1	1	1	0	1	1	1	1	0	1	0	1
0	1	0	0	1	1	1	1	2	1	1	1	0	0	0	1
1	0	0	0	1	1	1	0	0	0	0	0	1	1	1	0
3	0	1	0	1	1	1	0	0	0	0	0	0	0	0	1
0	2	0	1	2	0	0	0	0	1	0	0	0	0	1	0
2	0	0	0	0	1	0	0	0	0	0	0	0	0	0	0
1	1	0	0	1	1	0	1	1	1	1	1	0	1	0	1
1	1	0	0	0	2	0	0	0	1	1	0	0	0	1	1
0	0	0	0	2	0	0	0	0	0	0	0	0	0	0	0
2	1	1	0	1	1	1	1	1	1	1	1	0	0	0	1
1	0	0	0	0	0	1	1	0	1	0	0	1	1	0	0
1	1	1	2	1	1	0	1	1	3	3	3	0	0	0	2
1	0	0	0	0	0	0	0	1	4	4	0	0	0	0	2
1	0	0	0	0	0	0	0	0	0	0	0	0	0	0	0
1	1	0	0	1	0	1	0	0	1	1	0	0	1	0	0
0	0	0	0	0	0	0	0	0	0	0	0	0	0	0	0
0	0	0	0	0	0	0	0	0	0	0	0	0	0	0	0
1	0	0	0	0	1	1	0	1	0	1	1	0	0	0	0
0	0	0	0	0	0	0	0	0	2	0	0	0	0	0	0
0	0	0	0	1	2	2	1	1	1	1	2	1	0	0	1
0	0	0	0	1	1	0	0	0	0	0	0	0	0	0	0
0	0	0	0	1	1	0	0	0	0	0	0	0	0	0	1
2	0	0	0	0	0	0	0	0	1	0	0	0	0	0	0
1	0	0	1	4	2	1	0	1	0	1	1	0	0	0	1
1	0	1	0	1	1	1	1	1	1	1	0	0	0	0	1
0	0	0	0	1	1	1	0	1	1	1	1	0	1	0	0
1	0	0	1	1	1	0	0	1	1	1	1	0	1	0	1
1	0	0	0	1	0	0	0	0	0	0	1	0	0	0	0
0	0	0	0	0	0	0	0	0	0	0	0	1	0	0	0
1	1	1	1	1	1	1	1	1	1	1	1	1	1	1	1
0	0	0	0	1	1	1	0	1	1	1	0	0	0	0	1
0	0	0	0	1	1	0	0	0	0	0	0	0	0	0	0
0	0	0	0	0	0	0	0	1	0	0	0	0	0	0	0
0	2	0	0	2	1	0	0	0	3	1	2	2	2	0	0
0	0	0	0	1	4	1	0	2	4	4	4	0	0	0	3
0	0	0	0	0	0	0	0	0	0	0	0	0	0	0	0
1	0	0	0	1	1	1	1	1	0	0	0	0	0	0	0
0	0	0	0	0	0	0	0	0	0	0	0	0	0	0	0
1	0	0	0	1	0	0	0	0	1	0	0	0	0	0	0
1	0	1	0	0	0	0	0	0	0	0	0	1	0	0	0
0	0	0	0	1	0	1	0	0	0	1	0	0	0	0	0
0	0	0	0	0	0	0	0	0	0	0	0	0	0	0	0
2	0	0	0	0	1	0	0	0	0	0	0	0	0	0	0
1	1	1	1	1	1	1	1	1	1	1	1	1	1	0	0
0	0	0	0	0	0	0	0	0	0	0	0	0	0	0	0
0	0	0	0	0	0	0	0	0	0	0	0	0	0	0	0
0	0	0	0	0	0	0	0	0	0	0	0	0	0	0	0
2	2	2	2	4	4	4	4	4	3	3	3	3	2	0	2
3	2	0	2	2	4	2	0	2	3	2	2	3	0	3	2
3	4	0	3	4	3	3	0	4	3	3	2	2	4	3	2
0	0	0	0	0	0	0	0	0	0	0	0	2	3	2	0
3	3	2	4	2	4	2	1	1	1	1	2	2	2	2	1
0	2	0	2	4	4	2	3	4	3	4	4	4	4	4	4
3	2	1	2	3	3	3	3	2	3	2	2	1	2	1	1
2	2	2	3	1	3	1	0	2	3	2	2	2	2	2	2
0	0	0	0	0	1	3	2	3	2	2	2	2	2	2	3
2	2	0	0	2	3	3	0	2	1	1	1	2	0	0	1
0	0	0	2	2	3	2	2	0	3	0	2	0	2	0	0
0	0	0	2	1	0	1	0	1	1	1	1	1	1	0	1
0	0	0	0	0	0	0	0	0	0	0	0	0	0	0	0
2	2	0	1	3	3	1	1	1	2	2	2	2	1	1	2
0	0	0	2	2	2	1	0	0	1	0	2	0	0	0	3
4	3	2	4	3	3	4	4	4	4	4	4	3	3	2	4
3	0	0	0	3	2	4	0	3	2	3	4	0	0	0	3
0	2	0	0	3	3	0	0	2	1	2	1	0	0	0	1
0	0	0	0	0	0	0	0	0	0	0	0	0	0	0	0
0	0	0	0	1	1	1	1	1	1	1	1	0	0	0	0
0	0	0	0	0	3	1	1	1	2	3	3	2	3	0	0
0	0	0	0	3	3	2	1	1	2	2	2	0	0	0	1
2	0	0	2	1	2	1	2	2	1	1	1	3	0	0	2
4	0	3	3	4	3	2	2	3	3	3	2	4	4	1	2
0	2	0	0	0	2	0	2	3	1	3	3	0	2	0	2
0	0	0	0	1	0	0	0	1	0	0	0	0	0	0	1
0	0	0	0	0	0	0	0	1	2	2	2	0	0	0	0
1	0	0	0	1	1	0	0	1	1	1	0	1	0	0	0
0	0	0	1	2	3	0	2	1	2	1	2	0	0	0	0
1	0	0	1	1	0	0	1	1	1	1	1	0	0	0	1
0	2	0	0	0	3	0	0	0	2	3	2	2	3	2	0
2	2	2	0	2	2	2	2	3	2	2	2	2	1	0	2
0	0	0	0	0	0	0	0	0	0	0	0	0	0	0	0
1	1	0	0	0	1	1	1	1	1	1	1	1	1	0	1
4	4	0	1	3	1	1	1	0	2	0	2	2	4	4	1
0	0	0	0	0	0	0	0	0	0	0	0	0	0	0	0
1	0	0	0	0	1	1	1	1	1	1	2	1	0	0	0
2	1	0	0	0	0	0	0	0	0	0	0	1	0	1	0
2	0	0	0	0	1	0	0	0	0	1	2	0	0	0	1
1	1	0	2	0	0	2	0	0	1	0	1	0	0	0	0
1	1	0	1	1	1	1	1	1	1	1	1	0	0	0	1
0	3	0	1	1	2	1	0	2	2	0	0	0	0	0	0
0	1	0	1	1	1	3	0	2	3	1	3	0	2	0	1
1	0	0	1	0	0	0	0	0	0	0	1	0	0	1	0
2	0	0	0	3	0	0	0	0	0	0	0	0	0	0	0
0	0	0	2	0	1	1	0	2	0	2	0	0	0	0	2
1	2	1	1	1	1	1	0	1	1	1	1	1	1	0	0
0	0	0	0	0	0	0	0	0	0	0	0	0	0	0	0
0	0	0	0	4	3	1	3	1	1	1	1	1	0	0	1
0	2	0	0	1	1	0	0	0	1	0	0	1	0	0	0
0	0	0	0	0	0	0	0	0	0	0	0	0	0	0	0
0	0	0	0	0	0	0	0	0	0	0	0	0	0	0	0
1	0	1	0	2	1	0	0	0	1	0	0	0	0	0	0
0	0	0	0	1	0	1	1	2	2	2	1	0	0	0	1
0	0	0	0	0	0	0	0	0	0	0	0	0	0	0	0
1	0	1	0	0	0	0	0	0	0	1	1	0	0	0	0
1	1	1	0	0	1	0	0	0	2	2	2	1	0	1	2
2	2	2	2	4	4	2	2	2	3	3	3	1	3	3	3
3	4	0	0	4	1	4	4	4	4	4	4	0	0	0	3
3	4	2	2	2	3	3	0	3	3	2	2	3	3	3	3
1	2	0	2	1	3	1	1	1	3	2	1	0	0	0	1
1	1	0	2	1	1	1	1	1	1	1	2	3	3	2	1
0	0	0	0	0	1	0	0	0	0	0	0	0	0	0	0
1	0	0	0	0	3	1	0	0	2	2	2	0	0	0	0
0	0	0	0	1	1	0	0	1	1	1	1	0	1	0	1
0	2	2	3	1	3	2	3	2	3	3	3	2	2	0	2
0	0	0	0	0	0	0	0	0	0	0	0	0	0	0	0
0	0	0	0	0	0	0	0	0	0	0	0	0	0	0	0
0	0	0	0	1	0	0	0	0	1	0	0	0	1	0	0
1	2	0	0	3	4	3	3	3	3	3	3	2	3	0	1
1	0	0	0	0	1	0	0	0	1	0	1	0	0	0	0
0	0	0	0	0	0	0	0	0	0	0	0	0	0	0	0
0	0	0	0	0	0	0	0	0	0	0	0	0	0	0	0
1	0	0	0	0	0	0	0	0	0	0	0	1	0	1	0
